# Supplementary material
Source: HighWire-hosted journal article supplement (https://care.diabetesjournals.org/content/suppl/2009/05/07/dc07-2137)
Supplement: Table3AdjusttoTarget.pdf [file Table3AdjusttoTarget.pdf]

|                                   | Total Insulin (units)                      |            | Insulin Glargine (units)                  |            | Insulin Glulisine (units)                 |            | Glargine/Glulisine Ratio |             |
|-----------------------------------|--------------------------------------------|------------|-------------------------------------------|------------|-------------------------------------------|------------|--------------------------|-------------|
|                                   | Simple Algorithm                           | Carb Count | Simple Algorithm                          | Carb Count | Simple Algorithm                          | Carb Count | Simple Algorithm         | Carb Count  |
| <b>Baseline</b>                   | 107.8                                      | 100.9      | 53.9                                      | 50.5       | 53.9                                      | 50.5       | 50.0%/50.0%              | 50.0%/50.0% |
| <b>Week 3</b>                     | 119.8                                      | 114.5      | 62.6                                      | 60.0*      | 57.9                                      | 55.0       | 51.9%/48.1%              | 52.2%/47.8% |
| <b>Week 6</b>                     | 143.4                                      | 131.0*     | 73.6                                      | 66.4*      | 70.5                                      | 64.7       | 51.1%/48.9%              | 54.8%/45.2% |
| <b>Week 9</b>                     | 161.7                                      | 144.6*     | 82.2                                      | 72.4*      | 80.0                                      | 72.4       | 50.7%/49.3%              | 50.0%/50.0% |
| <b>Week 12</b>                    | 176.0                                      | 154.7*     | 88.3                                      | 77.1*      | 88.7                                      | 78.0*      | 49.9%/50.1%              | 49.7%/50.3% |
| <b>Week 15</b>                    | 183.8                                      | 162.7*     | 90.4                                      | 80.0*      | 93.8                                      | 83.5*      | 49.1%/50.9%              | 48.9%/51.1% |
| <b>Week 18</b>                    | 194.6                                      | 171.8*     | 95.4                                      | 83.7*      | 100.8                                     | 87.6*      | 48.6%/51.4%              | 48.9%/51.1% |
| <b>Week 21</b>                    | 203.1                                      | 169.3*     | 99.4                                      | 85.3*      | 106.1                                     | 84.1*      | 48.4%/51.6%              | 50.3%/49.7% |
| <b>Week 24</b>                    | 207.4                                      | 175.5*     | 102.5                                     | 86.4*      | 108.7                                     | 88.9*      | 49.3%/50.7%              | 48.5%/51.5% |
| <b>Mean Difference at Week 24</b> | -31.8<br>(-48.7, -15.0)<br><i>P</i> =.0002 |            | -16.1<br>(-22.5, -9.7)<br><i>P</i> <.0001 |            | -19.7<br>(-31.6, -7.9)<br><i>P</i> =.0011 |            |                          |             |
